# Supplementary material
Source: publisher figshare collection journal article supplement (https://karger.figshare.com/articles/dataset/_/26162332)
Supplement: Supplementary file 1 [file 4]

**Figure S1. Numerous lipids contained in ACP**

**A-B: Representative preoperative magnetic resonance (MR) image of a typical ACP patient showing cystic–solid feature.**

**C: Representative photograph showing the dissected tumour tissue.**

**D- G: Representative H&E-stained image of tumour tissue sections from patient**

**Fig S2. SIM did not inhibit PCP proliferation**

**A-B: Flow cytometry analysis of the PCP cell cycle in the SIM treatment group after 24h, 48h, and 72h.**

**C-D: Differences in apoptosis of PCP cells detected by flow cytometry analysis after 24h and 48h of action of 0.3 μMol SIM.**
